# Supplementary material
Source: publisher site journal article supplement (https://www.dovepress.com/get_supplementary_file.php?f=448671.docx)
Supplement: Supplementary file 1 [file get_supplementary_file.php]

**Supplemental Digital Content 1**

Best-corrected visual acuity (BCVA) after the first three injectionsof conbercept plus dexamethasone or conbercept alone for macular edema secondary to central retinal vein occlusion

|  | Conbercept | Conbercept+DEX |
| --- | --- | --- |
| Intravitreal Injection-1 |  |  |
| n-1 | 31 | 33 |
| 1-PRE | 37.81 ± 17.63 | 35.85 ± 16.09 |
| 1w-1 | 51.10 ± 20.58a | 50.03 ± 20.05a |
| 1m-1 | 53.71 ± 19.84a | 53.64 ± 21.18a |
| Intravitreal Injection-2 |  |  |
| n-2 | 29 | 31 |
| 2-PRE | 40.86 ± 19.15 | 38.09 ± 14.71 |
| 1w-2 | 53.28 ± 18.31a | 50.26 ± 21.27a |
| 1m-2 | 55.72 ± 19.72a | 54.09 ± 20.83ab |
| Intravitreal Injection-3 |  |  |
| n-3 | 17 | 24 |
| 3-PRE | 42.47 ± 17.43 | 41.08 ± 14.71 |
| 1w-3 | 55.94 ± 16.57a | 55.25 ± 18.63a |
| 1m-3 | 52.35 ± 17.96a | 57.83 ± 19.76a |

-PRE = before the intravitreal injection; 1w- = 1 week after the intravitreal injection; 1m-= 1 month after the intravitreal injection

a: BCVA improved relative to the pre-injection value, *P*< 0.05

b: BCVA improved relative to the value at 1 week after injection, *P*< 0.05

**Supplemental Digital Content 2**

CRT before, 1 week after, and 1 month after intravitreal injection in the first three therapies

CRT-1st intravitreal injection

| Group | Pre- | 1 week | 1month | *F* | *P* |
| --- | --- | --- | --- | --- | --- |
|  |  |  |
| conbercept(n=31) | 742.61±275.83 | 355.39±78.10a | 382.29±147.00a | 50.69 | <0.01 |
| conbercept+DEX (n=33) | 718.48±247.70 | 337.21±76.70a | 293.67±89.31ab | 82.13 | <0.01 |
| *F* | 0.136 | 0.882 | 8.615 |  |  |
| *P* | 0.714 | 0.351 | 0.005 |  |  |

*F*Group=2.359,*P*=0.130;*F*Time=127.83,*P*<0.05;*F*Group*Time=0.97,P>0.05

CRT-2nd intravitreal injection

| Group | Pre- | 1 week | 1month | *F* | *P* |
| --- | --- | --- | --- | --- | --- |
|  |  |  |
| conbercept(n=29) | 570.45±164.54 | 297.69±55.62a | 360.97±167.57ab | 38.99 | <0.01 |
| conbercept+DEX (n=31) | 586.26±163.13 | 280.16±37.56a | 280.68±81.58a | 93.34 | <0.01 |
| *F* | 0.140 | 2.070 | 5.683 |  |  |
| *P* | 0.710 | 0.156 | 0.020 |  |  |

*F*Group=1.622,*P*=0.208;*F*Time=119.102,*P*<0.05；*F*Group*Time=2.815,*P*>0.05

CRT-3rd intravitreal injection

| Group | Pre | 1 week | 1month | *F* | *P* |
| --- | --- | --- | --- | --- | --- |
|  |  |  |
| conbercept(n=17) | 617.94±164.68 | 296.94±47.51a | 378.65±203.15a | 35.69 | <0.01 |
| conbercept+DEX (n=24) | 597.96±149.16 | 275.63±37.46a | 255.96±30.41ab | 146.21 | <0.01 |
| *F* | 0.164 | 2.578 | 8.571 |  |  |
| *P* | 0.688 | 0.116 | 0.006 |  |  |

*F*Group=3.503,*P*=0.069;*F*Time=139.1,*P*<0.05;*F*Group*Time=3.845,*P*=0.028

a:Compared with pre-intravitreal injection,*P*<0.01; b: Compared with 1 week after intravitreal injection, P<0.05
